# Supplementary material for: 自分らしい生き方探し (焦点 心とからだのSATカウンセリング)
Source: MDPI journal article supplement (doi:10.3390/plants11141882), 2006-01-01
Supplement: s1 [file s1]

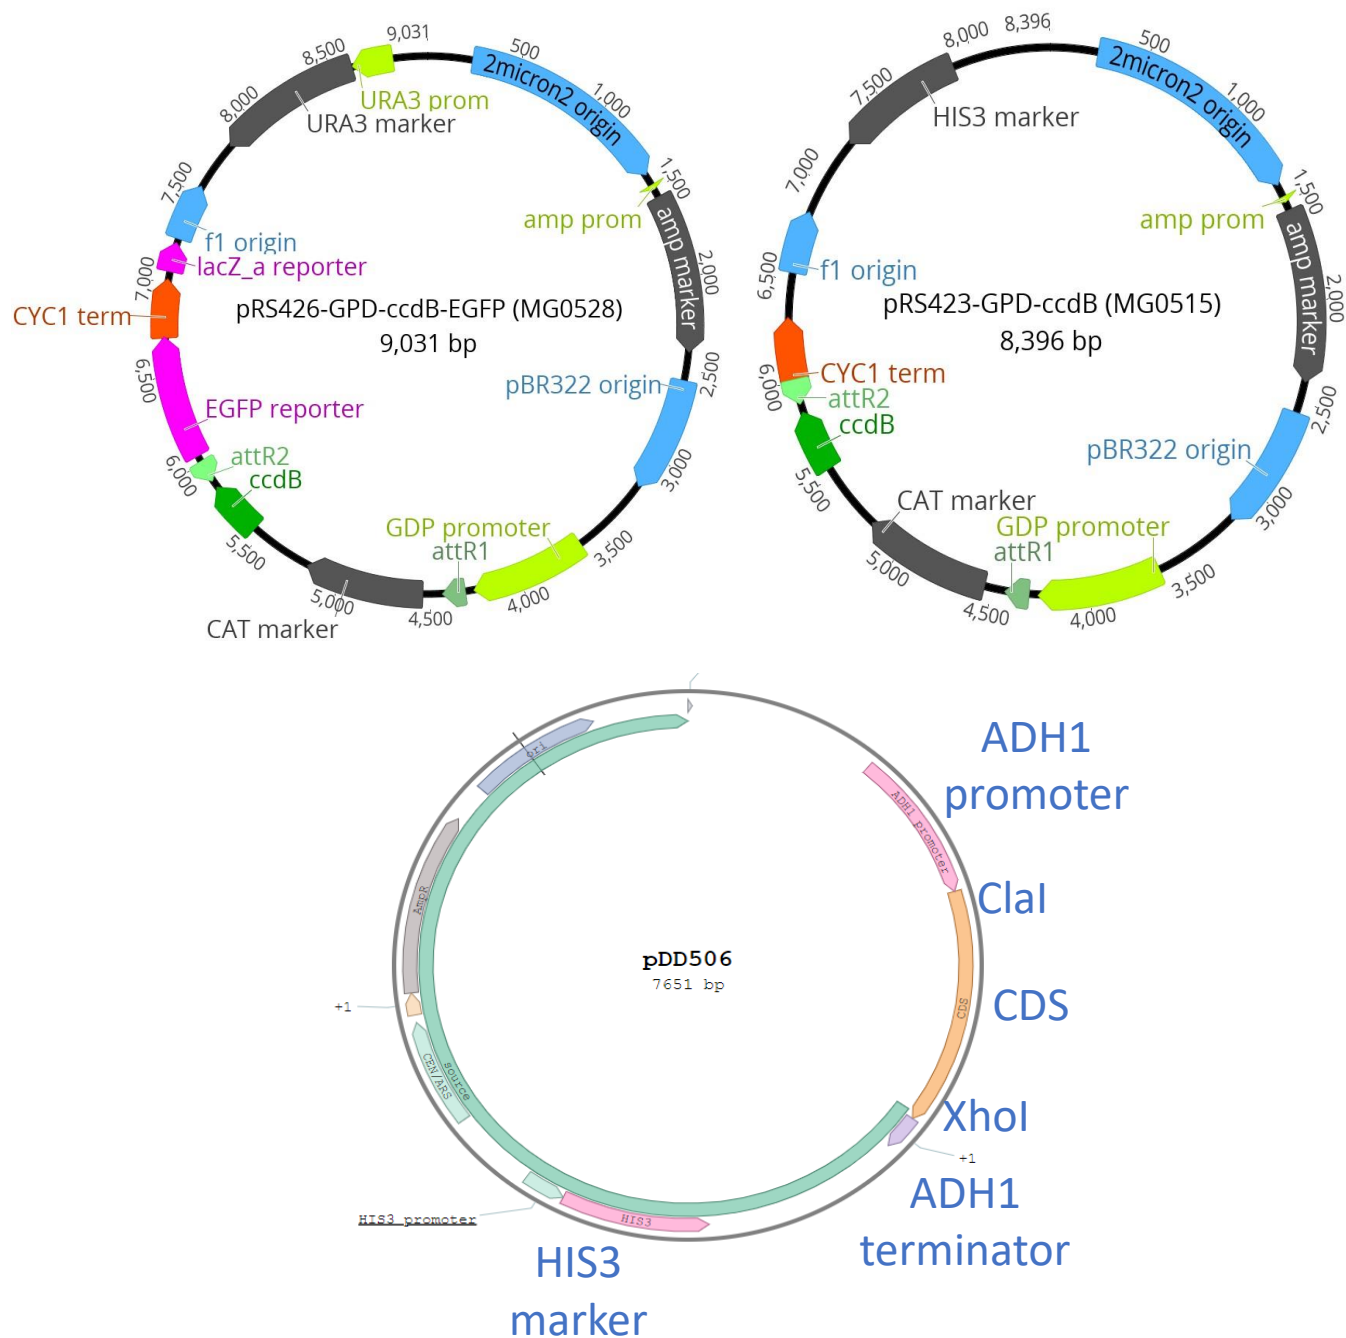

**Figure S1. Plasmids MGO515 (HIS3), MGO528 (URA3) and pDD506 (HIS3) were used in this study for the overexpression of proteins in *S. cerevisiae***

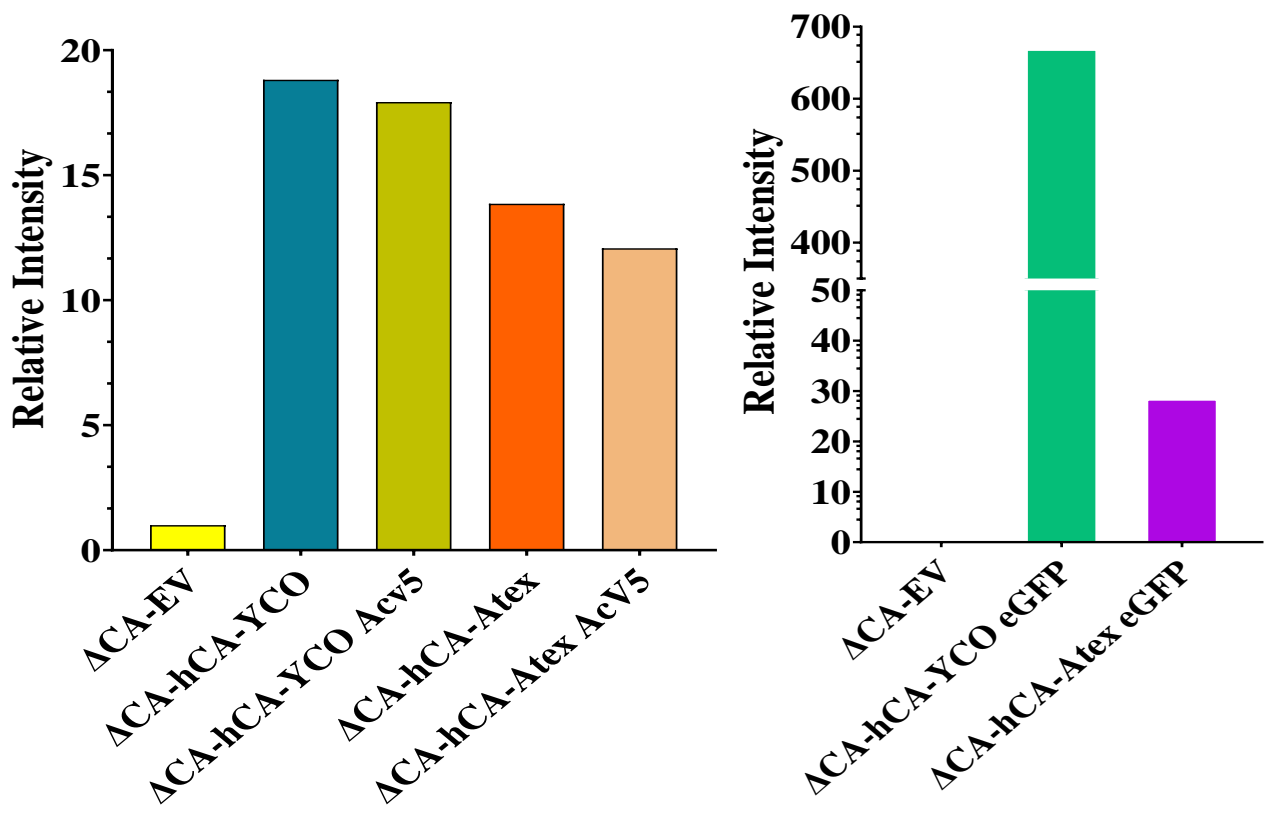

**Figure S2: Relative intensity of the modified hCA bands for the immunoblot experiment shown in Figures 6a and 6b**

**Table S1 . Primers used in this study for cloning.**

A. Primers used in the PCR amplified disruption cassettes for gene disruption

| Primer Name | Sequence                                                                                   |
|-------------|--------------------------------------------------------------------------------------------|
| DD0-1976    | TCTTCTGAAAACCCCAACCACATCAACTACAGCTAAGACTACAAATTTCAATT<br>ATTACACATCAGAGCAGATTGTACTGAGAGTGC |
| DD0-1976    | CCGTCTACTTTGTAAATGTCTTTCTATTTCAATGAATATTATATAAGTATATCGGT<br>GAGGCTAAAACTCCTTACGCATCTGTGCGG |

B. Primers used for the confirmation of successful gene disruption

| Primer Name            | Sequence                 |
|------------------------|--------------------------|
| NCE103 delete check Fw | GAATTAATTCGCATTGTCACCATG |
| NCE103 delete check Rv | CATCATTCTATTCAAAAGGTAAG  |
| pRS universal Fw       | GCACTCTCAGTACAATCTGC     |
| pRS universal Rv       | CCGCACAGATGCGTAAGGAG     |

C. Primers used for the cloning

| Primer Name | Sequence                            |
|-------------|-------------------------------------|
| CAH5 Fw     | CTATATCGATATGTCGTCGCGGAATGTCGCT     |
| CAH5 Rv     | CTATCTCGAGGCTTAGGCAATCTCGGTCACCTTGC |
| CAH3 Fw     | CTATATCGATATGGCAGCTTGGAAGTATGGCG    |
| CAH3 Rv     | CTATCTCGAGGCTCGTATTCGACCAGGCGG      |
| AtβCA3 Fw   | CTATATCGATATGTCGACAGAGTCGTACG       |
| AtβCA3 Rv   | CTATCTCGAGTTAAGACAAGGCAAAGGCA       |
